# Supplementary material for: 1H-Phenanthro[9,10-d]imidazole functionalized iron(ii,iii)oxide nanoparticle for magnetically recoverable nanocatalyst for monoalkylation of cyclam
Source: Research Square preprint supplement (doi:10.21203/rs.3.rs-8277664/v1), 2025-12-11
Supplement: Supplementary file 1 [file 69cc70c26d7c8f05cbb63940.docx]

**SUPPORTING INFORMATION:**

**1H-Phenanthro[9,10-d]imidazole functionalized iron(ii,iii)oxide nanoparticle for magnetically recoverable nanocatalyst for monoalkylation of cyclam**

Uğur TAŞDEMİR, Aslıhan YILMAZ OBALI*

Department of Chemistry, Science Faculty, Selcuk University, Türkiye

*Corresponding Author, aslihanyilmaz@selcuk.edu.tr


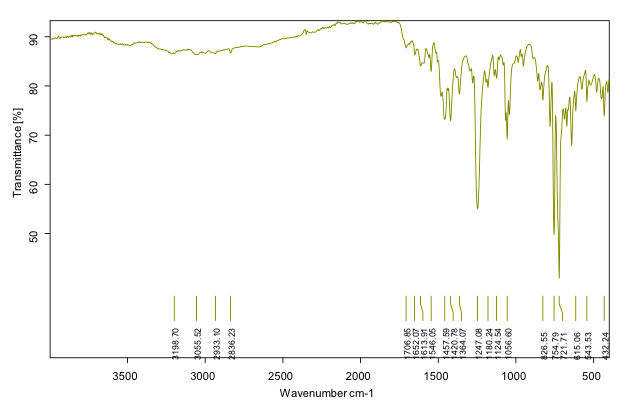


**Fig. S1.** The FT-IR spectrum of **1**.


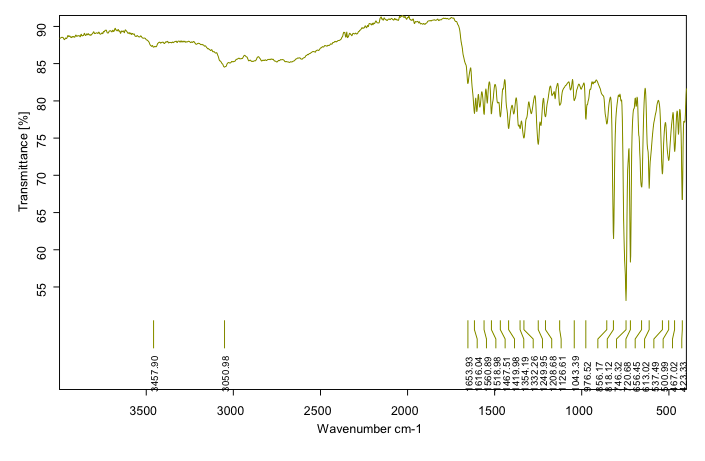


**Fig. S2.** The FT-IR spectrum of **2**.


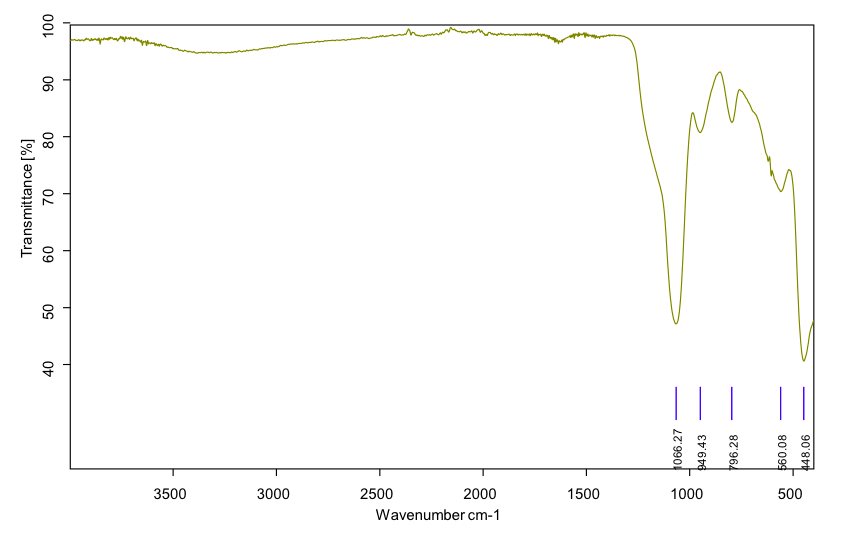


**Fig. S3.** The FT-IR spectrum ofFe3O2@SiO2@CPTMS.


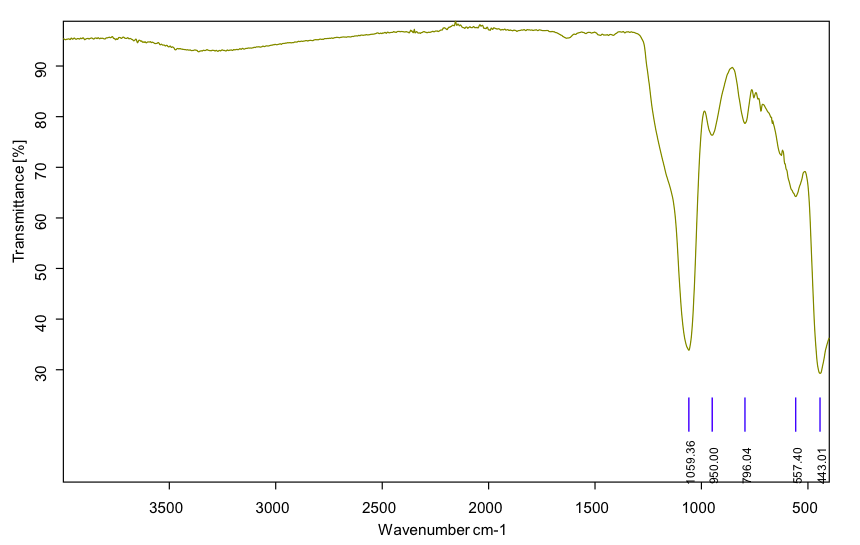


**Fig. S4.** The FT-IR spectrum ofMNP1.


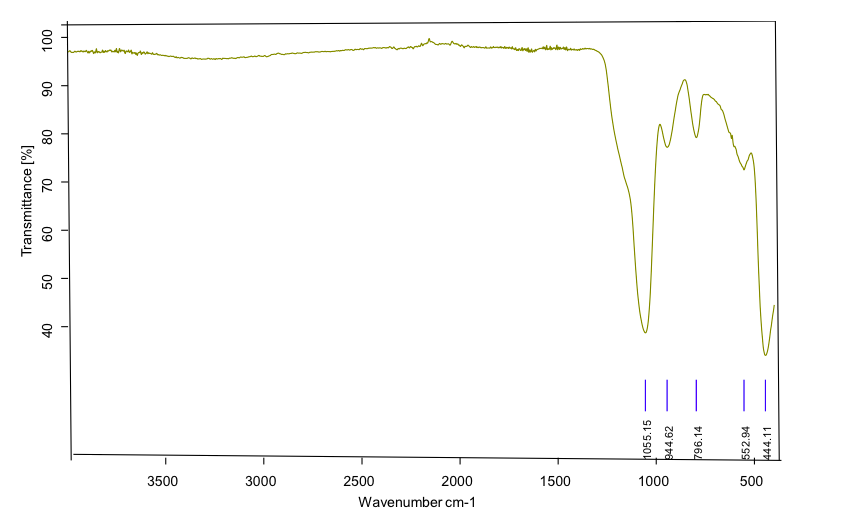


**Fig. S5.** The FT-IR spectrum of MNP2.

**Fig.S6.**  1H-NMR spectrum of **1**.

**Fig.S7.**  1H-NMR spectrum of **2**.

**Fig.S8.**  13C-NMR spectrum of **1**.

**Fig.S9.**  13C-NMR spectrum of **2**.
